# Supplementary material for: Modes of Cell Death Induced by Photodynamic Therapy Using Zinc Phthalocyanine in Lung Cancer Cells Grown as a Monolayer and Three-Dimensional Multicellular Spheroids
Source: MDPI journal article supplement (doi:10.3390/molecules22050791), 2017-05-16
Supplement: s1 [file s1]

| Pathway                                | Genes                                                                                                                                                                                                                                                                                                                                                                                 |
|----------------------------------------|---------------------------------------------------------------------------------------------------------------------------------------------------------------------------------------------------------------------------------------------------------------------------------------------------------------------------------------------------------------------------------------|
| <b><i>Induction of Apoptosis:</i></b>  |                                                                                                                                                                                                                                                                                                                                                                                       |
| Death Domain Receptors                 | CRADD, FADD, TNF, TNFRSF10B (DR5)                                                                                                                                                                                                                                                                                                                                                     |
| DNA Damage                             | ABL1, CIDEA, CIDEB, TP53, TP73                                                                                                                                                                                                                                                                                                                                                        |
| Extracellular Signals                  | CFLAR (CASPER), DAPK1, TNFRSF25 (DR3)                                                                                                                                                                                                                                                                                                                                                 |
| Other                                  | BAD, BAK1, BAX, BCL10, BCL2L11, BID, BIK, BNIP3, BNIP3L, CASP1 (ICE), CASP10 (MCH4), CASP14, CASP2, CASP3, CASP4, CASP6, CASP8, CD27 (TNFRSF7), CD70 (TNFSF7), CYCS, DFFA, DIABLO (SMAC), FAS (TNFRSF6), FASLG (TNFSF6), GADD45A, HRK, LTA (TNFB), NOD1 (CARD4), PYCARD (TMS1/ASC), TNFRSF10A, TNFRSF9, TNFSF10 (TRAIL), TNFSF8, TP53BP2, TRADD, TRAF3                                |
| <b><i>Anti-Apoptosis:</i></b>          |                                                                                                                                                                                                                                                                                                                                                                                       |
|                                        | AKT1, BAG1, BAG3, BAX, BCL2, BCL2A1 (Bfl-1/A1), BCL2L1 (BCL-X), BCL2L10, BCL2L2, BFAR, BIRC3 (c-IAP1), BIRC5, BIRC6, BNIP2, BNIP3, BNIP3L, BRAF, CD27 (TNFRSF7), CD40LG (TNFSF5), CFLAR (CASPER), DAPK1, FAS (TNFRSF6), HRK, IGF1R, IL10, MCL1, NAIP (BIRC1), NFKB1, NOL3, RIPK2, TNF, XIAP (BIRC4).                                                                                  |
| <b><i>Regulation of Apoptosis:</i></b> |                                                                                                                                                                                                                                                                                                                                                                                       |
| Negative Regulation                    | BAG1, BAG3, BCL10, BCL2, BCL2A1 (Bfl-1/A1), BCL2L1 (BCL-X), BCL2L10, BCL2L2, BFAR, BIRC2 (c-IAP2), BIRC3 (c-IAP1), BIRC6, BNIP2, BNIP3, BNIP3L, BRAF, CASP3, CD27 (TNFRSF7), CD40LG (TNFSF5), CFLAR (CASPER), CIDEA, DAPK1, DFFA, FAS (TNFRSF6), IGF1R, MCL1, NAIP (BIRC1), NOL3, TP53, TP73, XIAP (BIRC4)                                                                            |
| Positive Regulation                    | ABL1, AKT1, BAD, BAK1, BAX, BCL2L11, BID, BIK, BNIP3, BNIP3L, CASP1 (ICE), CASP10 (MCH4), CASP14, CASP2, CASP4, CASP6, CASP8, CD40 (TNFRSF5), CD70 (TNFSF7), CIDEB, CRADD, FADD, FASLG (TNFSF6), HRK, LTA (TNFB), LTBR, NOD1 (CARD4), PYCARD (TMS1/ASC), RIPK2, TNF, TNFRSF10A, TNFRSF10B (DR5), TNFRSF25 (DR3), TNFRSF9, TNFSF10 (TRAIL), TNFSF8, TP53, TP53BP2, TRADD, TRAF2, TRAF3 |
| <b><i>Death Domain Proteins:</i></b>   |                                                                                                                                                                                                                                                                                                                                                                                       |
|                                        | CRADD, DAPK1, FADD, TNFRSF10A, TNFRSF10B (DR5), TNFRSF11B, TNFRSF1A, TNFRSF1B, TNFRSF21, TNFRSF25 (DR3), TRADD                                                                                                                                                                                                                                                                        |
| <b><i>Caspases and Regulators:</i></b> |                                                                                                                                                                                                                                                                                                                                                                                       |
| Caspases                               | CASP1 (ICE), CASP10 (MCH4), CASP14, CASP2, CASP3, CASP4, CASP5, CASP6, CASP7, CASP8, CASP9, CFLAR (CASPER), CRADD, PYCARD (TMS1/ASC)                                                                                                                                                                                                                                                  |
| Caspase Activators                     | AIFM1 (PDCD8), APAF1, BAX, BCL2L10, CASP1 (ICE), CASP9, NOD1 (CARD4), PYCARD (TMS1/ASC), TNFRSF10A, TNFRSF10B (DR5), TP53                                                                                                                                                                                                                                                             |
| Caspase inhibitors                     | CD27 (TNFRSF7), XIAP (BIRC4).                                                                                                                                                                                                                                                                                                                                                         |

*Housekeeping genes:*

ACTB, B2M, GAPDH, HPRT1, RPLP0

---
