# Supplementary material for: Modes of Cell Death Induced by Photodynamic Therapy Using Zinc Phthalocyanine in Lung Cancer Cells Grown as a Monolayer and Three-Dimensional Multicellular Spheroids
Source: MDPI journal article supplement (doi:10.3390/molecules22050791), 2017-05-16
Supplement: s1 [file s1]

| <b>Gene<br/>Symbol</b> | <b>Description</b>                                            | <b><i>P</i> value</b> | <b>Fold<br/>change</b> |
|------------------------|---------------------------------------------------------------|-----------------------|------------------------|
| ABL1                   | C-abl oncogene 1, non-receptor tyrosine kinase                | 0.041044              | 1.23                   |
| BAG3                   | BCL2-associated athanogene 3                                  | 0.005825              | 1.36                   |
| BAK1                   | BCL2-antagonist/killer 1                                      | 0.032953              | 1.41                   |
| BCL2L10                | BCL2-like 10 (apoptosis facilitator)                          | 0.029176              | 1.68                   |
| BID                    | BH3 interacting domain death agonist                          | 0.035285              | 1.20                   |
| BIRC3                  | Baculoviral IAP repeat containing 3                           | 0.022851              | -1.94                  |
| CASP3                  | Caspase 3, apoptosis-related cysteine peptidase               | 0.036496              | -1.70                  |
| CASP5                  | Caspase 5, apoptosis-related cysteine peptidase               | 0.027694              | 2.00                   |
| CASP6                  | Caspase 6, apoptosis-related cysteine peptidase               | 0.045153              | -1.16                  |
| GADD45A                | Growth arrest and DNA-damage-inducible, alpha                 | 0.004539              | 1.43                   |
| HRK                    | Harakiri, BCL2 interacting protein (contains only BH3 domain) | 0.025595              | 1.96                   |
| TNF                    | Tumour necrosis factor                                        | 0.007676              | 3.57                   |
| TP53BP2                | Tumour protein p53 binding protein, 2                         | 0.019300              | 1.21                   |
