# Supplementary material for: Modes of Cell Death Induced by Photodynamic Therapy Using Zinc Phthalocyanine in Lung Cancer Cells Grown as a Monolayer and Three-Dimensional Multicellular Spheroids
Source: MDPI journal article supplement (doi:10.3390/molecules22050791), 2017-05-16
Supplement: s1 [file s1]

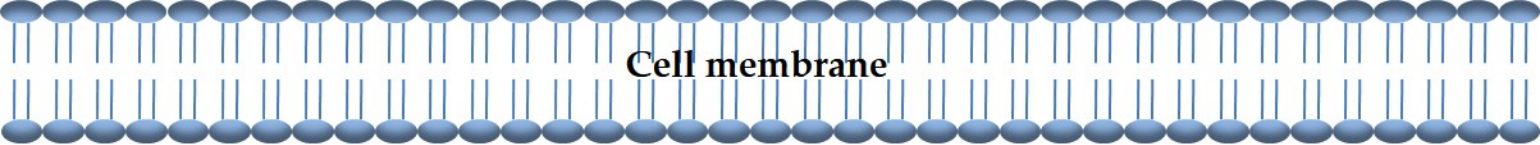

Cell membrane

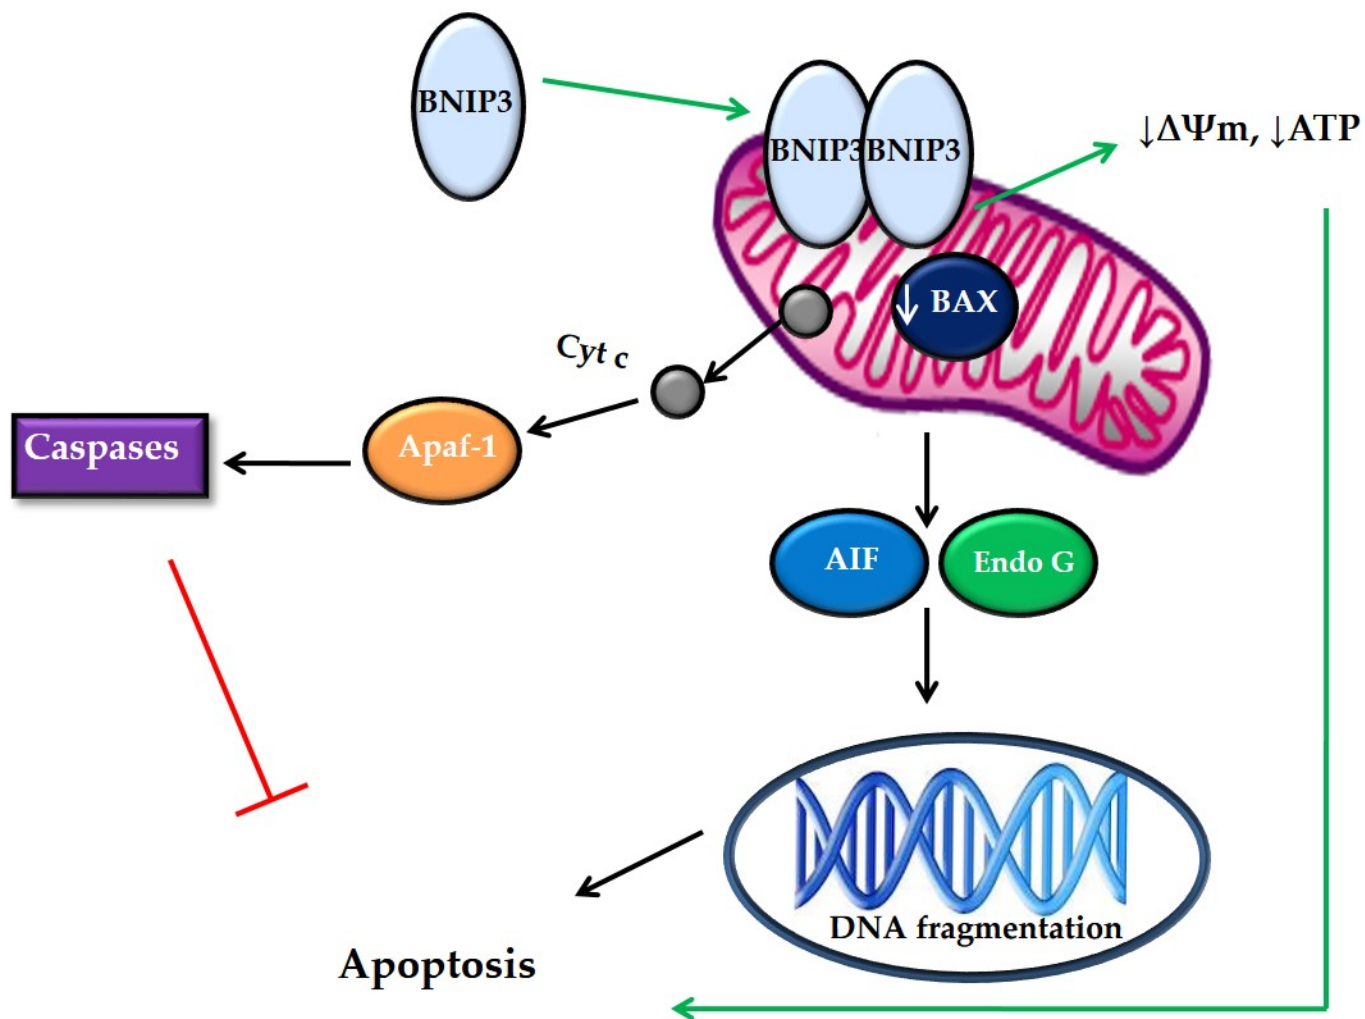

BNIP3

BNIP3BNIP3

$\downarrow \Delta \Psi_m, \downarrow \text{ATP}$

$\downarrow$  BAX

Cyt c

Caspases

Apaf-1

AIF

Endo G

DNA fragmentation

Apoptosis
