# Supplementary material for: Modes of Cell Death Induced by Photodynamic Therapy Using Zinc Phthalocyanine in Lung Cancer Cells Grown as a Monolayer and Three-Dimensional Multicellular Spheroids
Source: MDPI journal article supplement (doi:10.3390/molecules22050791), 2017-05-16
Supplement: s1 [file s1]

| Parameters                          | Description /Value      |
|-------------------------------------|-------------------------|
| Manufacture                         | Oriel Corporation, USA  |
| Wavelength (nm)                     | 680 nm                  |
| Wave emission                       | Continuous wave         |
| Power output (mW)                   | 44.2 mW                 |
| Power density (mW/cm <sup>2</sup> ) | 4.87 mW/cm <sup>2</sup> |
| Spot size (cm <sup>2</sup> )        | 9.1 cm <sup>2</sup>     |
| Fluence (J/cm <sup>2</sup> )        | 5 J/cm <sup>2</sup>     |
| Duration of exposure                | 17 min 7 s              |
