# Supplementary material for: Modes of Cell Death Induced by Photodynamic Therapy Using Zinc Phthalocyanine in Lung Cancer Cells Grown as a Monolayer and Three-Dimensional Multicellular Spheroids
Source: MDPI journal article supplement (doi:10.3390/molecules22050791), 2017-05-16
Supplement: s1 [file s1]

| Gene<br>Symbol | Description                                                          | P value  | Fold<br>change |
|----------------|----------------------------------------------------------------------|----------|----------------|
| AKT1           | V-akt murine thymoma viral oncogene homolog 1                        | 0.004728 | -2.71          |
| APAF1          | Apoptotic peptidase activating factor 1                              | 0.001058 | -1.85          |
| BAD            | BCL2-associated agonist of cell death                                | 0.000651 | -1.55          |
| BAG1           | BCL2-associated athanogene                                           | 0.034348 | -1.15          |
| BAX            | BCL2-associated X protein                                            | 0.000025 | -1.34          |
| BCL2           | B-cell CLL/lymphoma 2                                                | 0.040756 | -1.37          |
| BCL2A1         | BCL2-related protein A1                                              | 0.022347 | 1.52           |
| BCL2L1         | BCL2-like 1                                                          | 0.003947 | -1.42          |
| BCL2L11        | BCL2-like 11 (apoptosis facilitator)                                 | 0.001839 | -1.88          |
| BFAR           | Bifunctional apoptosis regulator                                     | 0.001219 | -1.35          |
| BID            | BH3 interacting domain death agonist                                 | 0.004052 | 1.10           |
| BIK            | BCL2-interacting killer (apoptosis-inducing)                         | 0.037813 | -1.33          |
| BIRC2          | Baculoviral IAP repeat containing 2                                  | 0.003434 | -1.41          |
| BIRC5          | Baculoviral IAP repeat containing 5                                  | 0.002518 | -1.45          |
| BIRC6          | Baculoviral IAP repeat containing 6                                  | 0.005218 | -1.13          |
| BNIP2          | BCL2/adenovirus E1B 19kDa interacting protein 2                      | 0.010379 | -1.44          |
| BNIP3          | BCL2/adenovirus E1B 19kDa interacting protein 3                      | 0.008524 | 1.09           |
| BNIP3L         | BCL2/adenovirus E1B 19kDa interacting protein 3-like                 | 0.009845 | -1.22          |
| BRAF           | V-raf murine sarcoma viral oncogene homolog B1                       | 0.001021 | -1.48          |
| CASP10         | Caspase 10, apoptosis-related cysteine peptidase                     | 0.011592 | -1.88          |
| CASP3          | Caspase 3, apoptosis-related cysteine peptidase                      | 0.012060 | -1.31          |
| CASP4          | Caspase 4, apoptosis-related cysteine peptidase                      | 0.000316 | -1.14          |
| CASP8          | Caspase 8, apoptosis-related cysteine peptidase                      | 0.002487 | -1.55          |
| CASP9          | Caspase 9, apoptosis-related cysteine peptidase                      | 0.009549 | -1.27          |
| CD27           | CD27 molecule                                                        | 0.003201 | -2.14          |
| CD40           | CD40 molecule, TNF receptor superfamily member 5                     | 0.005898 | -1.31          |
| CD40LG         | CD40 ligand                                                          | 0.022237 | -1.80          |
| CD70           | CD70 molecule                                                        | 0.001292 | -1.33          |
| CFLAR          | CASP8 and FADD-like apoptosis regulator                              | 0.007048 | -1.23          |
| CIDEA          | Cell death-inducing DFFA-like effector a                             | 0.012164 | -1.91          |
| CIDEB          | Cell death-inducing DFFA-like effector b                             | 0.013551 | -1.89          |
| CYCS           | Cytochrome c, somatic                                                | 0.002713 | -1.92          |
| DAPK1          | Death-associated protein kinase 1                                    | 0.002531 | -1.50          |
| DFFA           | DNA fragmentation factor, 45kDa, alpha polypeptide                   | 0.018676 | -1.30          |
| DIABLO         | Diablo, IAP-binding mitochondrial protein                            | 0.028232 | -1.17          |
| FADD           | Fas (TNFRSF6)-associated via death domain                            | 0.031986 | -1.58          |
| FASLG          | Fas ligand (TNF superfamily, member 6)                               | 0.023519 | -2.03          |
| GADD45A        | Growth arrest and DNA-damage-inducible, alpha                        | 0.033576 | -1.36          |
| IGF1R          | Insulin-like growth factor 1 receptor                                | 0.005120 | -1.87          |
| IL10           | Interleukin 10                                                       | 0.031649 | -2.02          |
| LTBR           | Lymphotoxin beta receptor (TNFR superfamily, member 3)               | 0.000921 | -1.15          |
| MCL1           | Myeloid cell leukemia sequence 1 (BCL2-related)                      | 0.000031 | -1.35          |
| NAIP           | NLR family, apoptosis inhibitory protein                             | 0.000071 | -1.75          |
| NFKB1          | Nuclear factor of kappa light polypeptide gene enhancer in B-cells 1 | 0.022455 | -1.25          |
| NOL3           | Nucleolar protein 3 (apoptosis repressor with CARD domain)           | 0.003923 | -1.15          |
| TNFRSF10A      | Tumour necrosis factor receptor superfamily, member 10a              | 0.038278 | -1.92          |
| TNFRSF10B      | Tumour necrosis factor receptor superfamily, member 10b              | 0.024560 | -1.95          |
| TNFRSF1A       | Tumour necrosis factor receptor superfamily, member 1A               | 0.006393 | -1.34          |
| TNFRSF25       | Tumour necrosis factor receptor superfamily, member 25               | 0.016203 | -2.02          |
| TNFSF10        | Tumour necrosis factor (ligand) superfamily, member 10               | 0.000060 | -2.10          |
| TNFSF8         | Tumour necrosis factor (ligand) superfamily, member 8                | 0.020311 | -1.83          |
| TP53           | Tumour protein p53                                                   | 0.044978 | -1.42          |
| TP53BP2        | Tumour protein p53 binding protein, 2                                | 0.001741 | -1.21          |
| TP73           | Tumour protein p73                                                   | 0.029935 | -2.43          |

|       |                                      |          |       |
|-------|--------------------------------------|----------|-------|
| TRADD | TNFRSF1A-associated via death domain | 0.001462 | -1.52 |
| TRAF3 | TNF receptor-associated factor 3     | 0.038438 | -1.26 |
| XIAP  | X-linked inhibitor of apoptosis      | 0.000493 | -1.61 |

---
