# Supplementary material for: Modes of Cell Death Induced by Photodynamic Therapy Using Zinc Phthalocyanine in Lung Cancer Cells Grown as a Monolayer and Three-Dimensional Multicellular Spheroids
Source: MDPI journal article supplement (doi:10.3390/molecules22050791), 2017-05-16
Supplement: s1 [file s1]

| Gene<br>Symbol | Description                                             | <i>P</i> value | Fold<br>change |
|----------------|---------------------------------------------------------|----------------|----------------|
| BAX            | BCL2-associated X protein                               | 0.045885       | -1.27          |
| BCL2L10        | BCL2-like 10 (apoptosis facilitator)                    | 0.034642       | 1.09           |
| BNIP3          | BCL2/adenovirus E1B 19kDa interacting protein 3         | 0.001461       | 1.71           |
| BNIP3L         | BCL2/adenovirus E1B 19kDa interacting protein 3-like    | 0.001464       | 1.74           |
| CD40LG         | CD40 ligand                                             | 0.023067       | 2.76           |
| FASLG          | Fas ligand (TNF superfamily, member 6)                  | 0.029662       | 3.52           |
| IL10           | Interleukin 10                                          | 0.000249       | 3.54           |
| TNFRSF11B      | Tumour necrosis factor receptor superfamily, member 11b | 0.004189       | -1.56          |
| TNFRSF21       | Tumour necrosis factor receptor superfamily, member 21  | 0.021550       | -1.20          |
