# Supplementary figures and images for: Modes of Cell Death Induced by Photodynamic Therapy Using Zinc Phthalocyanine in Lung Cancer Cells Grown as a Monolayer and Three-Dimensional Multicellular Spheroids
Source: MDPI journal article supplement (doi:10.3390/molecules22050791), 2017-05-16

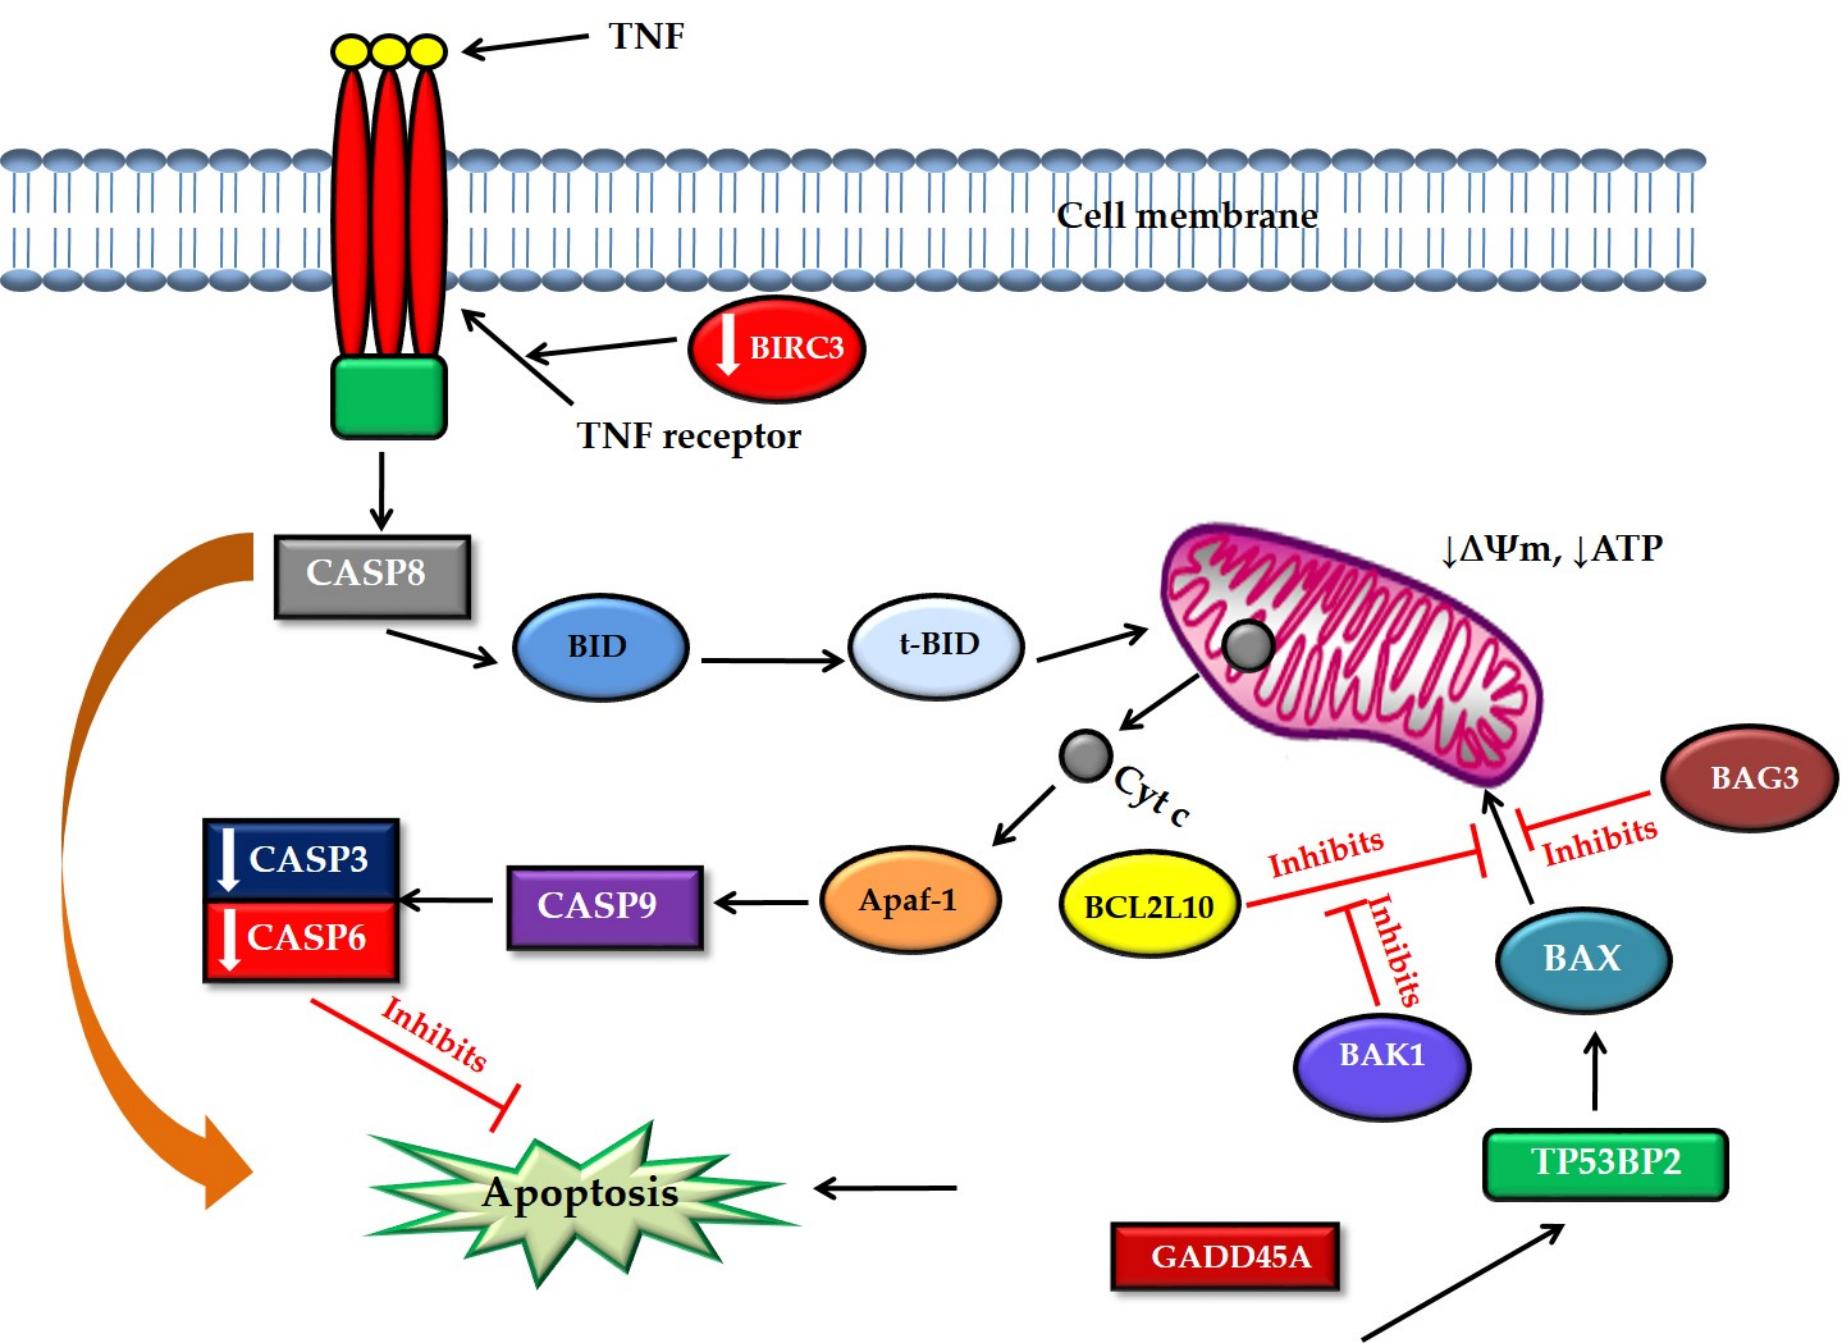

Supplement: s1 [file s1]

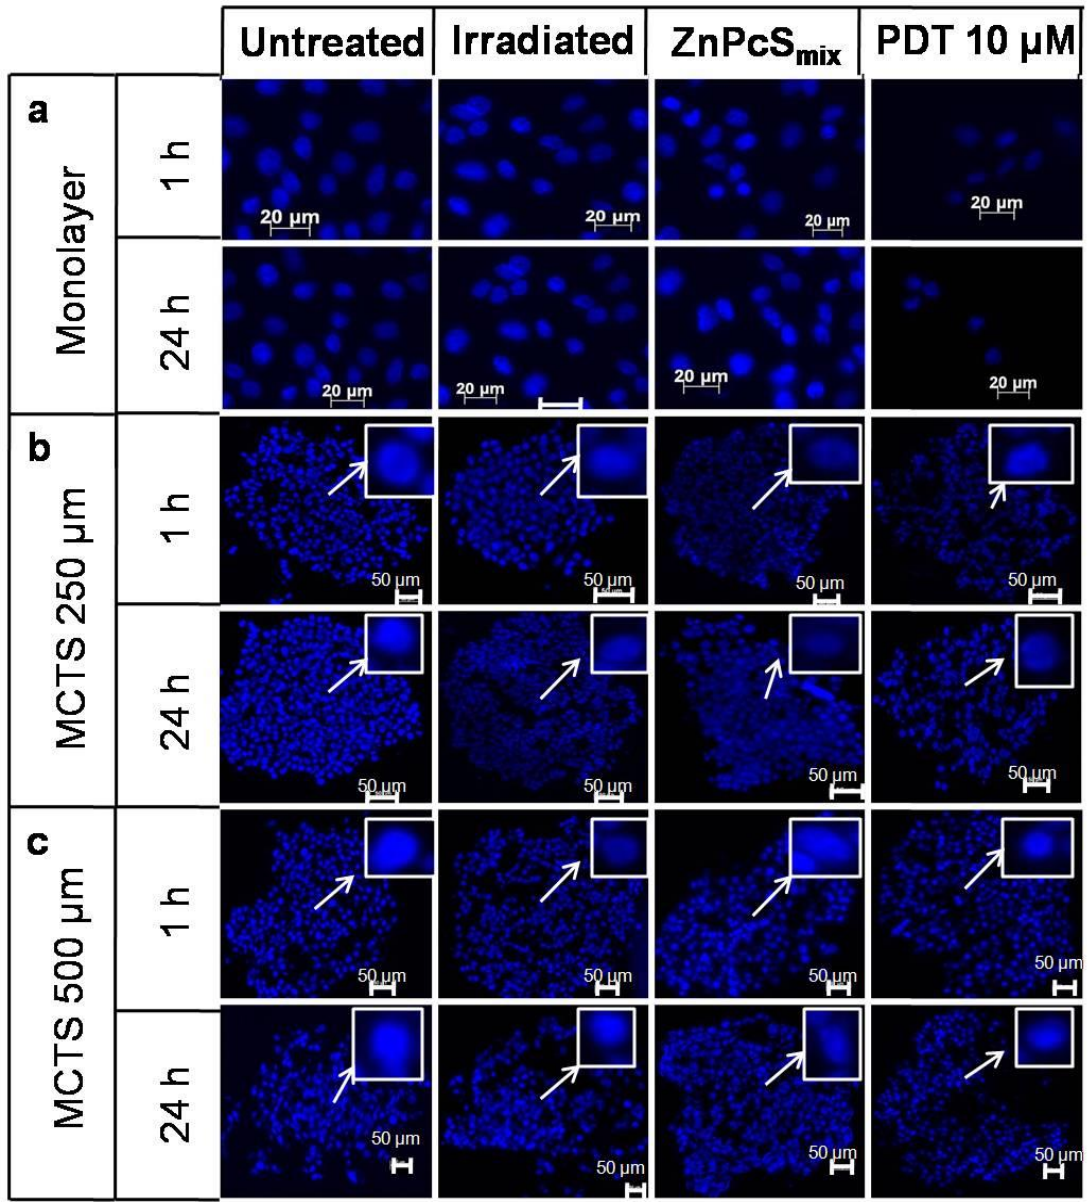

Supplement: s1 [file s1]
